# Supplementary material for: Probing Selective Adsorption in Cationic-Polymer Induced Aggregation of Binary Anionic Particulate Dispersions Using Solvent Relaxation NMR
Source: MDPI journal article supplement (doi:10.3390/polym14091875), 2022-05-04
Supplement: s1 [file s1]

# Probing Selective Adsorption in Cationic-Polymer Induced Aggregation of Binary Anionic Particulate Dispersions Using Solvent Relaxation NMR

Wasiu Abdullahi <sup>1</sup>, Martin Crossman <sup>2</sup> and Peter Charles Griffiths <sup>1,\*</sup>

<sup>1</sup> School of Science, Faculty of Engineering and Science, University of Greenwich, Chatham Maritime, Kent ME4 4TB, UK; w.o.abdullahi@greenwich.ac.uk

<sup>2</sup> Unilever Research, Port Sunlight, Quarry Road East, Bebington, Wirral CH63 3JW, UK; martin.crossman@unilever.com

\* Correspondence: p.griffiths@gre.ac.uk; Tel.: +44-208-331-9549

## Supplemental Section

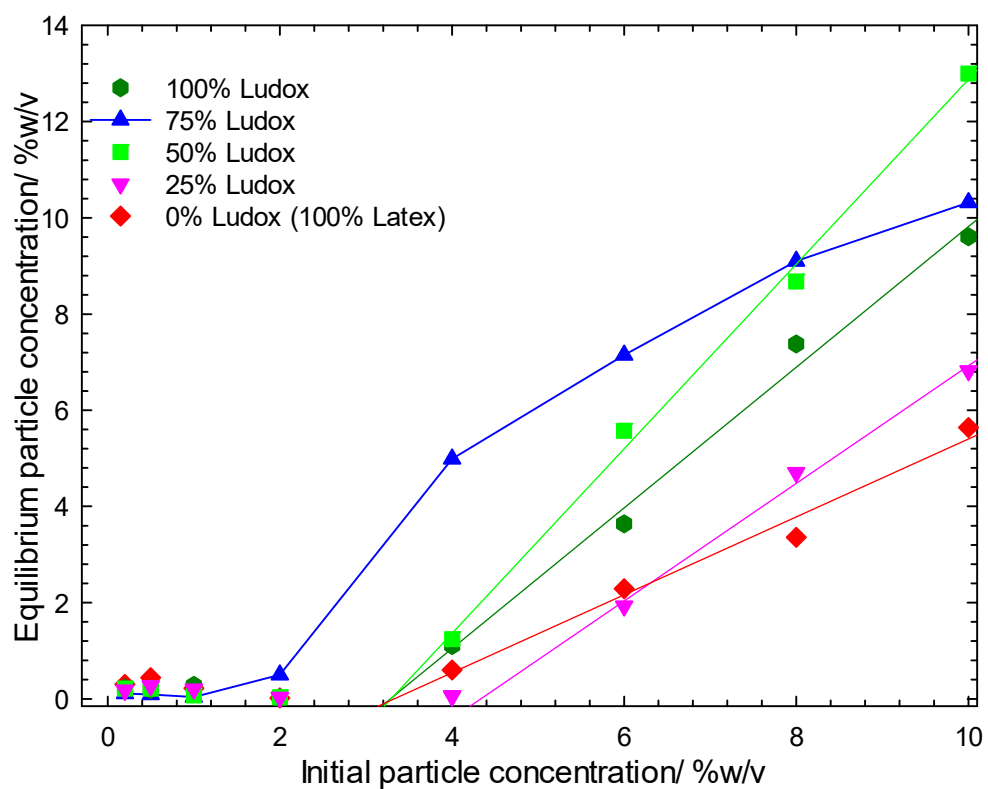

Figure S1. Pseudo-adsorption isotherm – the mass of particle removed from a series of Ludox-latex dispersions by gentle centrifugation after exposure to HEC LR at a concentration of 1000 ppm.

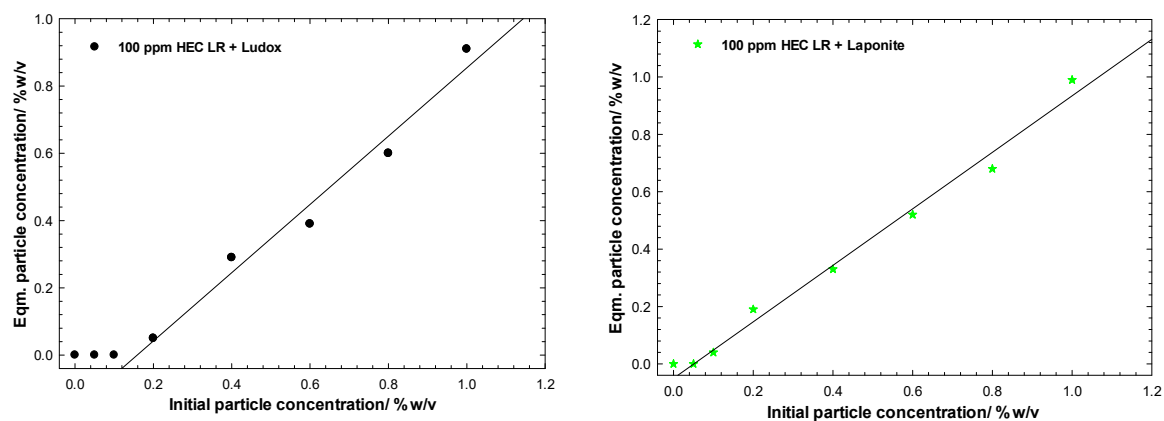

Figure S2. Pseudo-adsorption isotherm – the mass of particle removed from a series of dispersions comprising silica (left) and Laponite (right) by gentle centrifugation after exposure to HEC LR at a concentration of 100 ppm.

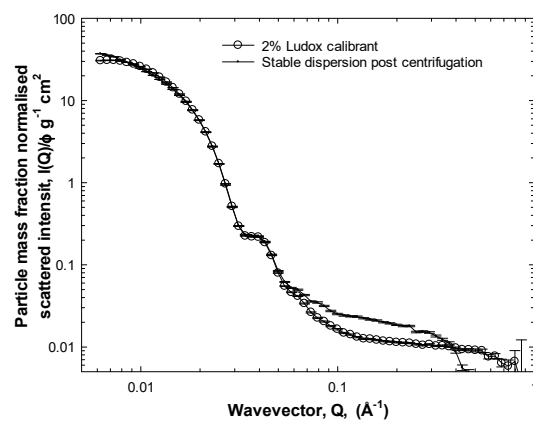

Figure S3. Small-angle neutron scattering from binary blends of Ludox/latex dispersions and a Ludox comparator to illustrate a lack of interparticle interaction or particle size fractionation.
